# Supplementary material
Source: PubMed Central journal article supplement (PMC4032135)
Supplement: supp_msu131_supplementary_tables.pdf [file supp_msu131_supplementary_tables.pdf]

**Table S1.** Rank correlation between trait importance (*TI*) and mean net effect size ( $|ES|$ ) or phenotypic variation (*CV*) of the wild-type when only positive effects or negative effects are considered.

| Effects considered | Variables correlated     | Variables controlled | Spearman's $\rho$ | <i>p</i> -value |
|--------------------|--------------------------|----------------------|-------------------|-----------------|
| positive           | <i>TI, CV</i>            |                      | -0.712            | <1e-300         |
| positive           | <i>TI, mean net  ES </i> |                      | -0.604            | <1e-300         |
| positive           | <i>TI, CV</i>            | mean net $ ES $      | -0.610            | 7.1e-22         |
| positive           | <i>TI, mean net  ES </i> | <i>CV</i>            | -0.434            | 1.2e-10         |
| negative           | <i>TI, CV</i>            |                      | -0.569            | <1e-300         |
| negative           | <i>TI, mean net  ES </i> |                      | -0.485            | <1e-300         |
| negative           | <i>TI, CV</i>            | mean net $ ES $      | -0.392            | 7.9e-09         |
| negative           | <i>TI, mean net  ES </i> | <i>CV</i>            | -0.209            | 2.9e-03         |

**Table S2.** Spearman's rank correlation between the importance of a gene expression trait to fitness and the mean effect size of gene deletion ( $|ES_G|$ ) or environmental perturbation ( $|ES_E|$ ) after expression levels are controlled.

| Variables correlated                   | Variables controlled                       | Spearman's $\rho$ | $p$ -value |
|----------------------------------------|--------------------------------------------|-------------------|------------|
| Fitness effect <sup>1</sup> , $ ES_E $ | Expression level <sup>3</sup>              | -0.196            | 2.2e-16    |
| Fitness effect <sup>1</sup> , $ ES_G $ | Expression level <sup>3</sup>              | -0.185            | 2.6e-25    |
| Fitness effect <sup>1</sup> , $ ES_E $ | Expression level <sup>3</sup> and $ ES_G $ | -0.145            | 3.5e-16    |
| Fitness effect <sup>1</sup> , $ ES_G $ | Expression level <sup>3</sup> and $ ES_E $ | -0.129            | 4.5e-13    |
| Essentiality <sup>2</sup> , $ ES_E $   | Expression level <sup>3</sup>              | -0.117            | 5.7e-11    |
| Essentiality <sup>2</sup> , $ ES_G $   | Expression level <sup>3</sup>              | -0.127            | 1.3e-12    |
| Essentiality <sup>2</sup> , $ ES_E $   | Expression level <sup>3</sup> and $ ES_G $ | -0.080            | 7.7e-06    |
| Essentiality <sup>2</sup> , $ ES_G $   | Expression level <sup>3</sup> and $ ES_E $ | -0.094            | 1.6e-07    |

<sup>1</sup> Fitness defect caused by deleting the gene.

<sup>2</sup> Essentiality = 0 for nonessential traits and 1 for essential traits.

<sup>3</sup> Expression level of the gene in the wild-type.

**Table S3.** Spearman's rank correlation between the importance of a gene expression trait to fitness and the mean effect size of gene deletion ( $|ES_G|$ ) or environmental perturbation ( $|ES_E|$ ) when  $|ES_E|$  are measured in all environmental changes.

| Variables correlated                   | Variables controlled                       | Spearman's $\rho$ | $p$ -value |
|----------------------------------------|--------------------------------------------|-------------------|------------|
| Fitness effect <sup>1</sup> , $ ES_E $ |                                            | -0.191            | 6.6e-27    |
| Fitness effect <sup>1</sup> , $ ES_G $ |                                            | -0.180            | 3.7e-24    |
| Fitness effect <sup>1</sup> , $ ES_E $ | $ ES_G $                                   | -0.138            | 9.4e-15    |
| Fitness effect <sup>1</sup> , $ ES_G $ | $ ES_E $                                   | -0.123            | 5.5e-12    |
| Essentiality <sup>2</sup> , $ ES_E $   |                                            | -0.117            | 6.4e-11    |
| Essentiality <sup>2</sup> , $ ES_G $   |                                            | -0.125            | 2.2e-12    |
| Essentiality <sup>2</sup> , $ ES_E $   | $ ES_G $                                   | -0.078            | 1.3e-05    |
| Essentiality <sup>2</sup> , $ ES_G $   | $ ES_E $                                   | -0.091            | 4.1e-07    |
| Fitness effect <sup>1</sup> , $ ES_E $ | Expression level <sup>3</sup>              | -0.234            | 5.8e-40    |
| Fitness effect <sup>1</sup> , $ ES_G $ | Expression level <sup>3</sup>              | -0.185            | 2.6e-25    |
| Fitness effect <sup>1</sup> , $ ES_E $ | Expression level <sup>3</sup> and $ ES_G $ | -0.183            | 7.8e-25    |
| Fitness effect <sup>1</sup> , $ ES_G $ | Expression level <sup>3</sup> and $ ES_E $ | -0.111            | 4.5e-10    |
| Essentiality <sup>2</sup> , $ ES_E $   | Expression level <sup>3</sup>              | -0.141            | 2.4e-15    |
| Essentiality <sup>2</sup> , $ ES_G $   | Expression level <sup>3</sup>              | -0.127            | 1.3e-12    |
| Essentiality <sup>2</sup> , $ ES_E $   | Expression level <sup>3</sup> and $ ES_G $ | -0.104            | 6.9e-09    |
| Essentiality <sup>2</sup> , $ ES_G $   | Expression level <sup>3</sup> and $ ES_E $ | -0.083            | 4.0e-06    |

<sup>1</sup> Fitness defect caused by deleting the gene.

<sup>2</sup> Essentiality = 0 for nonessential traits and 1 for essential traits.

<sup>3</sup> Expression level of the gene in the wild-type.

**Table S4.** Spearman’s rank correlation between the importance of a gene expression trait to fitness and the mean effect size of gene deletion ( $|ES_G|$ ) or environmental perturbation ( $|ES_E|$ ) after the removal of highly correlated expressional traits.

| Variables correlated                   | Variables controlled                       | Spearman’s $\rho$ | $p$ -value |
|----------------------------------------|--------------------------------------------|-------------------|------------|
| Fitness effect <sup>1</sup> , $ ES_E $ |                                            | -0.156            | 6.2e-10    |
| Fitness effect <sup>1</sup> , $ ES_G $ |                                            | -0.181            | 5.1e-13    |
| Fitness effect <sup>1</sup> , $ ES_E $ | $ ES_G $                                   | -0.099            | 8.9e-05    |
| Fitness effect <sup>1</sup> , $ ES_G $ | $ ES_E $                                   | -0.136            | 6.3e-08    |
| Essentiality <sup>2</sup> , $ ES_E $   |                                            | -0.104            | 4.0e-05    |
| Essentiality <sup>2</sup> , $ ES_G $   |                                            | -0.131            | 2.1e-07    |
| Essentiality <sup>2</sup> , $ ES_E $   | $ ES_G $                                   | -0.062            | 1.5e-02    |
| Essentiality <sup>2</sup> , $ ES_G $   | $ ES_E $                                   | -0.101            | 6.5e-05    |
| Fitness effect <sup>1</sup> , $ ES_E $ | Expression level <sup>3</sup>              | -0.196            | 4.7e-15    |
| Fitness effect <sup>1</sup> , $ ES_G $ | Expression level <sup>3</sup>              | -0.185            | 1.7e-13    |
| Fitness effect <sup>1</sup> , $ ES_E $ | Expression level <sup>3</sup> and $ ES_G $ | -0.141            | 2.1e-08    |
| Fitness effect <sup>1</sup> , $ ES_G $ | Expression level <sup>3</sup> and $ ES_E $ | -0.124            | 8.2e-07    |
| Essentiality <sup>2</sup> , $ ES_E $   | Expression level <sup>3</sup>              | -0.126            | 5.3e-07    |
| Essentiality <sup>2</sup> , $ ES_G $   | Expression level <sup>3</sup>              | -0.132            | 1.7e-07    |
| Essentiality <sup>2</sup> , $ ES_E $   | Expression level <sup>3</sup> and $ ES_G $ | -0.085            | 7.7e-04    |
| Essentiality <sup>2</sup> , $ ES_G $   | Expression level <sup>3</sup> and $ ES_E $ | -0.093            | 2.3e-04    |

<sup>1</sup> Fitness defect caused by deleting the gene.

<sup>2</sup> Essentiality = 0 for nonessential traits and 1 for essential traits.

<sup>3</sup> Expression level of the gene in the wild-type.

**Table S5.** Spearman’s rank correlation between the importance of a gene expression trait to fitness and the mean effect size of gene deletion ( $|ES_G|$ ) or environmental perturbation ( $|ES_E|$ ) for genes with and without a canonical TATA box in the promoter, respectively.

| Variables correlated                   | Variables controlled                       | TATA ( $n=563$ )  |            | Non-TATA ( $n=2726$ ) |            |
|----------------------------------------|--------------------------------------------|-------------------|------------|-----------------------|------------|
|                                        |                                            | Spearman’s $\rho$ | $p$ -value | Spearman’s $\rho$     | $p$ -value |
| Fitness effect <sup>1</sup> , $ ES_E $ |                                            | -0.185            | 2.4E-04    | -0.178                | 6.7E-21    |
| Fitness effect <sup>1</sup> , $ ES_G $ |                                            | -0.267            | 8.5E-08    | -0.155                | 4.0E-16    |
| Fitness effect <sup>1</sup> , $ ES_E $ | $ ES_G $                                   | -0.062            | 2.2E-01    | -0.139                | 3.4E-13    |
| Fitness effect <sup>1</sup> , $ ES_G $ | $ ES_E $                                   | -0.206            | 4.4E-05    | -0.107                | 2.3E-08    |
| Essentiality <sup>2</sup> , $ ES_E $   |                                            | -0.168            | 8.4E-04    | -0.105                | 3.7E-08    |
| Essentiality <sup>2</sup> , $ ES_G $   |                                            | -0.201            | 6.2E-05    | -0.109                | 1.3E-08    |
| Essentiality <sup>2</sup> , $ ES_E $   | $ ES_G $                                   | -0.081            | 1.1E-01    | -0.076                | 7.4E-05    |
| Essentiality <sup>2</sup> , $ ES_G $   | $ ES_E $                                   | -0.138            | 6.6E-03    | -0.080                | 2.6E-05    |
| Fitness effect <sup>1</sup> , $ ES_E $ | Expression level <sup>3</sup>              | -0.232            | 3.6E-06    | -0.214                | 1.2E-29    |
| Fitness effect <sup>1</sup> , $ ES_G $ | Expression level <sup>3</sup>              | -0.294            | 3.4E-09    | -0.147                | 1.5E-14    |
| Fitness effect <sup>1</sup> , $ ES_E $ | Expression level <sup>3</sup> and $ ES_G $ | -0.112            | 2.8E-02    | -0.179                | 5.6E-21    |
| Fitness effect <sup>1</sup> , $ ES_G $ | Expression level <sup>3</sup> and $ ES_E $ | -0.215            | 1.9E-05    | -0.085                | 9.3E-06    |
| Essentiality <sup>2</sup> , $ ES_E $   | Expression level <sup>3</sup>              | -0.205            | 4.6E-05    | -0.124                | 7.9E-11    |
| Essentiality <sup>2</sup> , $ ES_G $   | Expression level <sup>3</sup>              | -0.221            | 1.1E-05    | -0.102                | 9.0E-08    |
| Essentiality <sup>2</sup> , $ ES_E $   | Expression level <sup>3</sup> and $ ES_G $ | -0.118            | 2.0E-02    | -0.097                | 3.8E-07    |
| Essentiality <sup>2</sup> , $ ES_G $   | Expression level <sup>3</sup> and $ ES_E $ | -0.144            | 4.5E-03    | -0.067                | 4.9E-04    |

<sup>1</sup> Fitness defect caused by deleting the gene.

<sup>2</sup> Essentiality = 0 for nonessential traits and 1 for essential traits.

<sup>3</sup> Expression level of the gene in the wild-type.
